# Supplementary material for: A Critical Domain of Ebolavirus Envelope Glycoprotein Determines Glycoform and Infectivity
Source: PubMed Central journal article supplement (PMC5882653; doi:10.1038/s41598-018-23357-8), 2018-04-03

# Supplementary Information

**Title: A Critical Domain of Ebolavirus Envelope Glycoprotein Determines Glycoform and Infectivity**

## **Authors and Affiliations**

Haruhiko Fujihira<sup>1,2,3\*</sup>, Katsuaki Usami<sup>1</sup>, Keita Matsuno<sup>4,5</sup>, Hideyuki Takeuchi<sup>1,6</sup>, Kaori Denda-Nagai<sup>1,2</sup>, Jun-ichi Furukawa<sup>7,8</sup>, Yasuro Shinohara<sup>7,9</sup>, Ayato Takada<sup>5,10</sup>, Yoshihiro Kawaoka<sup>11,12,13</sup>, and Tatsuro Irimura<sup>1,2\*</sup>

<sup>1</sup>Laboratory of Cancer Biology and Molecular Immunology, Graduate School of Pharmaceutical Sciences, The University of Tokyo, Tokyo 113-0033, Japan

<sup>2</sup>Division of Glycobiologics, Intractable Disease Research Center, Juntendo University Graduate School of Medicine, Tokyo 113-8421, Japan

<sup>3</sup>Glycometabolome Team, Systems Glycobiology Research Group, Global Research Cluster, RIKEN, Saitama 351-0198, Japan

<sup>4</sup>Laboratory of Microbiology, Faculty of Veterinary Medicine, Hokkaido University, Sapporo 060-0818, Japan

<sup>5</sup>Division of International Services, Global Institution for Collaborative Research and Education (GI-CoRE), Hokkaido University, Sapporo 001-0020, Japan

<sup>6</sup>Department of Molecular Biochemistry, Nagoya University School of Medicine, Nagoya 4668550, Japan

<sup>7</sup>Laboratory of Medical and Functional Glycomics, Graduate School of Advanced Life Science, Hokkaido University, Sapporo 001-0021, Japan

<sup>8</sup>Department of Advanced clinical glycobiology, Faculty of Medicine and Graduate School of Medicine, Hokkaido University, Sapporo 0010021, Japan

<sup>9</sup>Department of Pharmacy, Kinjo Gakuin University, Nagoya 4638521, Japan

25 <sup>10</sup>Division of Global Epidemiology, Hokkaido University Research Center for Zoonosis  
26 Control, Sapporo 001-0020, Japan

27 <sup>11</sup>CREST, Japan Science and Technology Agency, Saitama 332-0012, Japan

28 <sup>12</sup>Division of Virology, Department of Microbiology and Immunology, Institute of  
29 Medical Science, The University of Tokyo, Tokyo 108-8639, Japan

30 <sup>13</sup>Department of Pathobiological Sciences, University of Wisconsin, Madison, WI  
31 53706, USA

32

### 33 **Supplementary Figure Legends**

34 **Supplementary Figure 1. Amino acid sequences of ZGP and RGP.** Amino acid  
35 sequences of ZGP and RGP are shown. Red box: 33-50 amino acid residue, green box:  
36 mucin-like domain, orange line: border of GP1 and GP2.

### 37 **Supplemental Figure 2. MALDI-TOF MS spectra of *N*-glycans released from VLPs.**

38 Representative MS spectra of *N*-glycans released from VLPs bearing (a) ZGP, (b) RGP,  
39 (c) Z33-50R, (d) Z33-186, (e) R33-50, or (f) R33-186 are shown. Magnified spectra  
40 between  $m/z=3800$  and  $m/z=4200$  are shown in the upper right window of each  
41 spectrum.

### 42 **Supplementary Figure 3. Biosynthetic rate and intracellular localization of RGP**

43 **and ZGP were not different.** (a) Results of pulse chase experiments of [<sup>35</sup>S]-labeled

44 RGP and [<sup>35</sup>S]-labeled ZGP are shown. **(b)** Results of immunofluorescent staining of  
45 VLP-producing HEK293T cells. Red: GP (ZGP or RGP), Green: Golgi marker (GM130  
46 or TGN46). Representative results are shown.

47 **Supplementary Figure 4. Sialylation and fucosylation of *N*-glycans found in GPs**  
48 **were not different.** Relative ratios of sialylated **(a)** or fucosylated **(b)** *N*-glycans are  
49 shown.

50 **Supplementary Figure 5. Uncropped images of blots shown in the figures (Fig. 1c,**  
51 **1d, 2b, 3b, 3d, 5a).**

52 **Supplementary Figure 6. GPs that lack 18 amino acid residues (33 through 50) is**  
53 **expressed on the VSV pseudotyped viruses and VLPs.**

54 **(a-b)** Results of immunoblotting using VSV pseudotyped viruses or VLPs containing  
55 ZGPΔ33-50 or RGPΔ33-50 are shown. **(c)** Results of virus titration experiment of VSV  
56 pseudotyped ZGP, RGP, ZGPΔ33-50, and RGPΔ33-50 using Vero E6 cells. VSV  
57 pseudotyped with ZGP/RGP without 18 amino acids (N-terminal 33rd through 50th) did  
58 not show any infectivity to Vero E6 cells. (n=3)

59

## 60 **Supplementary Materials and Methods**

61 **Pulse chase experiment.** HEK293T cells ( $6 \times 10^5$ ) were seeded on a 6-well culture plate  
62 one day before transfection. Cells were transfected with pCAGGS-GP and  
63 pCAGGS-VP40 by using Trans-IT LT1 in the same way as in VLP production. The cells  
64 were washed with PBS 24 hours after transfection and subsequently cultured with  
65 DMEM-HG (10% FCS, without Met and Cys; Gibco) for 1 hour. Then the medium was  
66 changed to DMEM-HG (10% FCS, containing 150  $\mu\text{Ci/mL}$  of [ $^{35}\text{S}$ ]-labeled Met and  
67 Cys) and cultured for 30 min. The medium was changed to DMED-HG (10% FCS) after  
68 washing with DMEM-HG (10% FCS) and cultured for 0, 1, 2, or 3 hours. Cells were  
69 collected after washing with PBS and solubilized with RIPA buffer containing protease  
70 inhibitor cocktail (Calbiochem) by shaking at 4°C for 2 hours. The solution was  
71 centrifuged at 21,500g for 15 min to remove cellular debris. The supernatant was  
72 collected, and the radioactivity of [ $^{35}\text{S}$ ] in the supernatant was measured by a liquid  
73 scintillation counter (LS6000SC, BECKMAN). GPs were immunoprecipitated using  
74 mAb 42/3.7 from lysates containing equal amounts of [ $^{35}\text{S}$ ] radioactivity.  
75 Immunoprecipitated GPs were separated on an 8% SDS-PAGE gel. The gel was then

76 fixed and stained with CBB (BioRad). The gel was dried (RapiDry mini; ATTO) and  
77 [<sup>35</sup>S]-labeled GPs were detected with Typhoon FLA9000 (GE Healthcare).

78 **Immunofluorescent staining.** HEK293T cells ( $4 \times 10^6$ ) were seeded on a 10 cm culture  
79 dish one day before transfection. Cells were transfected with pCAGGS-GP and  
80 pCAGGS-VP40 by using Trans-IT LT1 in the same way as in VLP production. 24 hours  
81 after transfection, cells were washed with PBS three times and collected. Collected cells  
82 were fixed with 20 mM sodium phosphate buffer (pH 7.0) containing 4 (w/v) %  
83 paraformaldehyde at 4°C for 1 hour. Fixed cells were washed with 10 mM glycine in  
84 PBS, and permeabilized by 0.1 (w/v) % Triton X-100 in PBS (at room temperature for 5  
85 min). The cells were blocked with 4 (w/v) % BSA in PBS at room temperature for 30  
86 min, and incubated with anti-EBOV GP1 mAb 42/3.7 (10 µg/mL) and rabbit  
87 anti-GM130 (10 µg/mL; Abcam) or rabbit anti-TGN46 antibody (10 µg/mL; Abcam),  
88 followed by Alexa 568 goat anti-mouse IgG(H+L) (10 µg/mL; Molecular Probes) and  
89 Alexa 488 goat anti-rabbit IgG(H+L) (10 µg/mL; Molecular Probes) and DAPI  
90 (Boehringer Mannheim). Analysis was performed using a Leica TSC SP5 confocal  
91 microscope (Leica).

92 **Supplemental Table 1. Primer sequences that used to make chimeric GPs**

| Chimeric GPs |         | Primer Sequences                             |
|--------------|---------|----------------------------------------------|
| Z311-462R    | forward | CCGCTCGAGGTCTCGATAGAACTGTGAAAGACAACCTCTTC    |
|              | reverse | CGGAATTCGGTCTCCAACACTCATCACCAAGATAACC        |
| Z297-462R    | forward | CGGAATTCGGTCTCGAAAAGTTTTTTTTTAGTTTCCCAGAAGGC |
|              | reverse | CGGAATTCGGTCTCCAACACTCATCACCAAGATAACC        |
| Z260-462R    | forward | CGGAATTCGGTCTCCGAAGTGTCTCATTTCAGCTGGAGC      |
|              | reverse | CGGAATTCGGTCTCCAACACTCATCACCAAGATAACC        |
| Z187-462R    | forward | CGGAATTCGGTCTCTCTGACAGTATCAGAAATGCAACGAC     |
|              | reverse | CGGAATTCGGTCTCCAACACTCATCACCAAGATAACC        |
| Z33-462R     | forward | CGCGGTCTCGGCATGGAAAATGTTCTTTGGAAAAGG         |
|              | reverse | CGGAATTCGGTCTCCAACACTCATCACCAAGATAACC        |
| Z1-462R      | forward | CCGCTCGAGGTCTCCCCATTGTGTTGTTGGATCCTC         |
|              | reverse | CGGAATTCGGTCTCCAACACTCATCACCAAGATAACC        |
| Z33-186R     | forward | CGCGGTCTCCATGCCGCTTGGTATAGTG                 |
|              | reverse | CGCGGTCTCCGGGGCAGAATTAAAAAAGCTACGACACC       |
| Z33-50R      | forward | CGCGGTCTCCATGCCGCTTGGTATAGTG                 |
|              | reverse | CGCGGTCTCACTAGTTGATCAATTTCTGTTGCTTTG         |
| R33-186Z     | forward | CGCGGTCTCCATCCCACTTGGAGTCATC                 |
|              | reverse | CGCGGTCTCTCTGACAGTATCAGAAATGCAACGACA         |
| R33-50R      | forward | CGCGGTCTCACTAGTTTGTCTGTCGACAAAC              |
|              | reverse | CGCGGTCTCGGCATGGAAAATGTTCTTTGGAAAAGG         |

Figure S1

|     |     |                                  |                                   |                                  |                                 |                                  |
|-----|-----|----------------------------------|-----------------------------------|----------------------------------|---------------------------------|----------------------------------|
| ZGP | 1   | MGVT-GIQLL<br>** **              | PRDRFKR <sup>TSF</sup><br>** **   | FLWVILFOR<br>*****               | TFSIPLGVIH<br>* **              | NSTLQVSDVD<br>*** *              |
| RGP | 1   | MGSYQLLQL                        | PRERFRK <sup>TSF</sup>            | LVWVILFOR                        | AISMPLGIVT                      | NSTLKATEID                       |
| ZGP | 50  | KLVC <sup>RD</sup> KLSS<br>***** | TNOLRSVGLN<br>* **                | LEGNGVATDV<br>*****              | PSATKRWGFR<br>*****             | SGVPPKVVNY<br>*****              |
| RGP | 50  | QLVC <sup>RD</sup> KLSS          | TSOLKSVGLN                        | LEGNGIATDV                       | PSATKRWGFR                      | SGVPPKVVSY                       |
| ZGP | 100 | EAGEWAENCY<br>*****              | NLEIKK <sup>DGS</sup><br>*****    | ECLPAAPDGI<br>*****              | RGFPRCRYVH<br>*****             | KVSGTGPCAG<br>** **              |
| RGP | 100 | EAGEWAENCY                       | NLEIKK DGS                        | ECLPLPPDGV                       | RGFPRCRYVH                      | KVQGTGPCPG                       |
| ZGP | 150 | DFAFHKEGAF<br>* **               | FLYDRLASTV<br>*****               | IYRGTTFAEG<br>*****              | VVAFILPQA<br>*****              | KKDFSSSHPL<br>** *               |
| RGP | 150 | DIAFHKNGAF                       | FLYDRLASTV                        | IYRGTTFAEG                       | VVAFILSEP                       | KKHFWKATPA                       |
| ZGP | 200 | REPVNATE <sup>DP</sup><br>*** ** | SSGYST <sup>TIR</sup><br>* **     | YQATGFGTNE<br>* **               | TEYLFEVDNL<br>** **             | TYVOLESRFT<br>*** **             |
| RGP | 200 | HEPVNTIDDS                       | TSYYMTL <sup>LS</sup>             | YEMSNFGGNE                       | SNTL <sup>FKVDNH</sup>          | TYVQLDRPHT                       |
| ZGP | 250 | POFL <sup>LOLNET</sup><br>*** ** | IYTSGKR <sup>SNT</sup><br>* **    | TGKLIWKVNP<br>* **               | EIDTTIGEWA<br>*** **            | FWETKKNL <sup>TR</sup><br>*** ** |
| RGP | 250 | POFLV <sup>OLNET</sup>           | LRRNNRL <sup>SNS</sup>            | TGRLI <sup>WLDL</sup>            | KIEPDVGEWA                      | FWETKKN <sup>FSQ</sup>           |
| ZGP | 300 | KIRSEELS <sup>FT</sup><br>* **   | VVSN <sup>GAKNIS</sup><br>* **    | GOSPART <sup>SSD</sup><br>*** ** | PGTNTT <sup>TEDH</sup>          | KIMASENS <sup>SA</sup><br>* **   |
| RGP | 300 | QLHGENL <sup>HFO</sup>           | IIS <sup>IHTNNS</sup>             | DOSPAG <sup>TVQG</sup>           | KISYHPPANN                      | SELVPTD <sup>SPP</sup>           |
| ZGP | 350 | MVQVHS <sup>QGRE</sup><br>* **   | AAVSHL <sup>TTLA</sup><br>* **    | TISTSP <sup>QSLT</sup><br>* **   | TKPGPD <sup>NSTH</sup><br>* **  | NTPVYK <sup>LDIS</sup><br>* **   |
| RGP | 350 | VVSVL <sup>TAGRT</sup>           | EEMST-Q <sup>GLT</sup>            | NGETIT-G <sup>FT</sup>           | ANPMTT <sup>TIAP</sup>          | -SPTMT <sup>SEVD</sup>           |
| ZGP | 400 | EATQVE <sup>QHHR</sup><br>** *   | RTD-ND <sup>STAS</sup><br>** *    | DTPSAT-- <sup>TA</sup>           | AGPPKA <sup>ENTN</sup><br>* **  | TSKSTDF <sup>LDP</sup><br>* **   |
| RGP | 400 | NNVPSE <sup>QPNN</sup>           | TASIED <sup>SPPS</sup>            | ASNETI <sup>YHSE</sup>           | MDPIQ <sup>GSNNS</sup>          | AQSPQ <sup>TKTP</sup>            |
| ZGP | 447 | ATTTSP <sup>QNH</sup><br>* **    | ETAGNN <sup>NTH</sup><br>* **     | QDTGEES <sup>ASS</sup><br>* **   | GKLG <sup>LITNTI</sup><br>** ** | AGVAG <sup>LITGG</sup><br>** **  |
| RGP | 447 | APTTSP <sup>MTD</sup>            | POETAN <sup>SSKP</sup>            | GTSPGSA <sup>AGP</sup>           | SQPG <sup>LITNTV</sup>          | SKVAD <sup>SLSPT</sup>           |
| ZGP | 497 | RRTR <sup>R</sup><br>* **        | EAI VNA <sup>QPKCNP</sup><br>* ** | LHYWT <sup>QDEG</sup><br>* **    | AAI <sup>GLAWIPY</sup><br>** ** | FGPAAE <sup>GIYI</sup><br>*****  |
| RGP | 497 | RKQKR <sup>R</sup>               | SVR QNTAN <sup>KCNP</sup>         | LYYWTAV <sup>DEG</sup>           | AAV <sup>GLAWIPY</sup>          | FGPAAE <sup>GIYI</sup>           |
| ZGP | 545 | EGLMHN <sup>ODGL</sup><br>** **  | ICGLROL <sup>ANE</sup><br>*****   | TTOALOLF <sup>LR</sup><br>*****  | ATTELRT <sup>FSL</sup><br>***** | LNRKAID <sup>FLL</sup><br>*****  |
| RGP | 545 | EGVMHN <sup>QNGL</sup>           | ICGLROL <sup>ANE</sup>            | TTOALOLF <sup>LR</sup>           | ATTELRT <sup>YSL</sup>          | LNRKAID <sup>FLL</sup>           |
| ZGP | 595 | QRWGGT <sup>CHIL</sup><br>*****  | GPDC <sup>CIEPHD</sup><br>** **   | WTKNIT <sup>DKID</sup><br>*****  | OIH <sup>HDFVDKT</sup><br>** ** | LPDQGD <sup>NDNW</sup><br>*** ** |
| RGP | 595 | QRWGGT <sup>CRIL</sup>           | GPSC <sup>CIEPHD</sup>            | WTKNIT <sup>DEIN</sup>           | OIKH <sup>DIDNP</sup>           | LPDHGD <sup>DINL</sup>           |
| ZGP | 645 | WTGWROW <sup>IWA</sup><br>*****  | GIGV <sup>TGVIA</sup><br>*** **   | VIAL <sup>FCKIF</sup><br>*** **  | VF                              |                                  |
| RGP | 645 | WTGWRQ <sup>WIPA</sup>           | GIGI <sup>IGVIA</sup>             | IIAL <sup>LCKIKI</sup>           | LC                              |                                  |

Figure S2

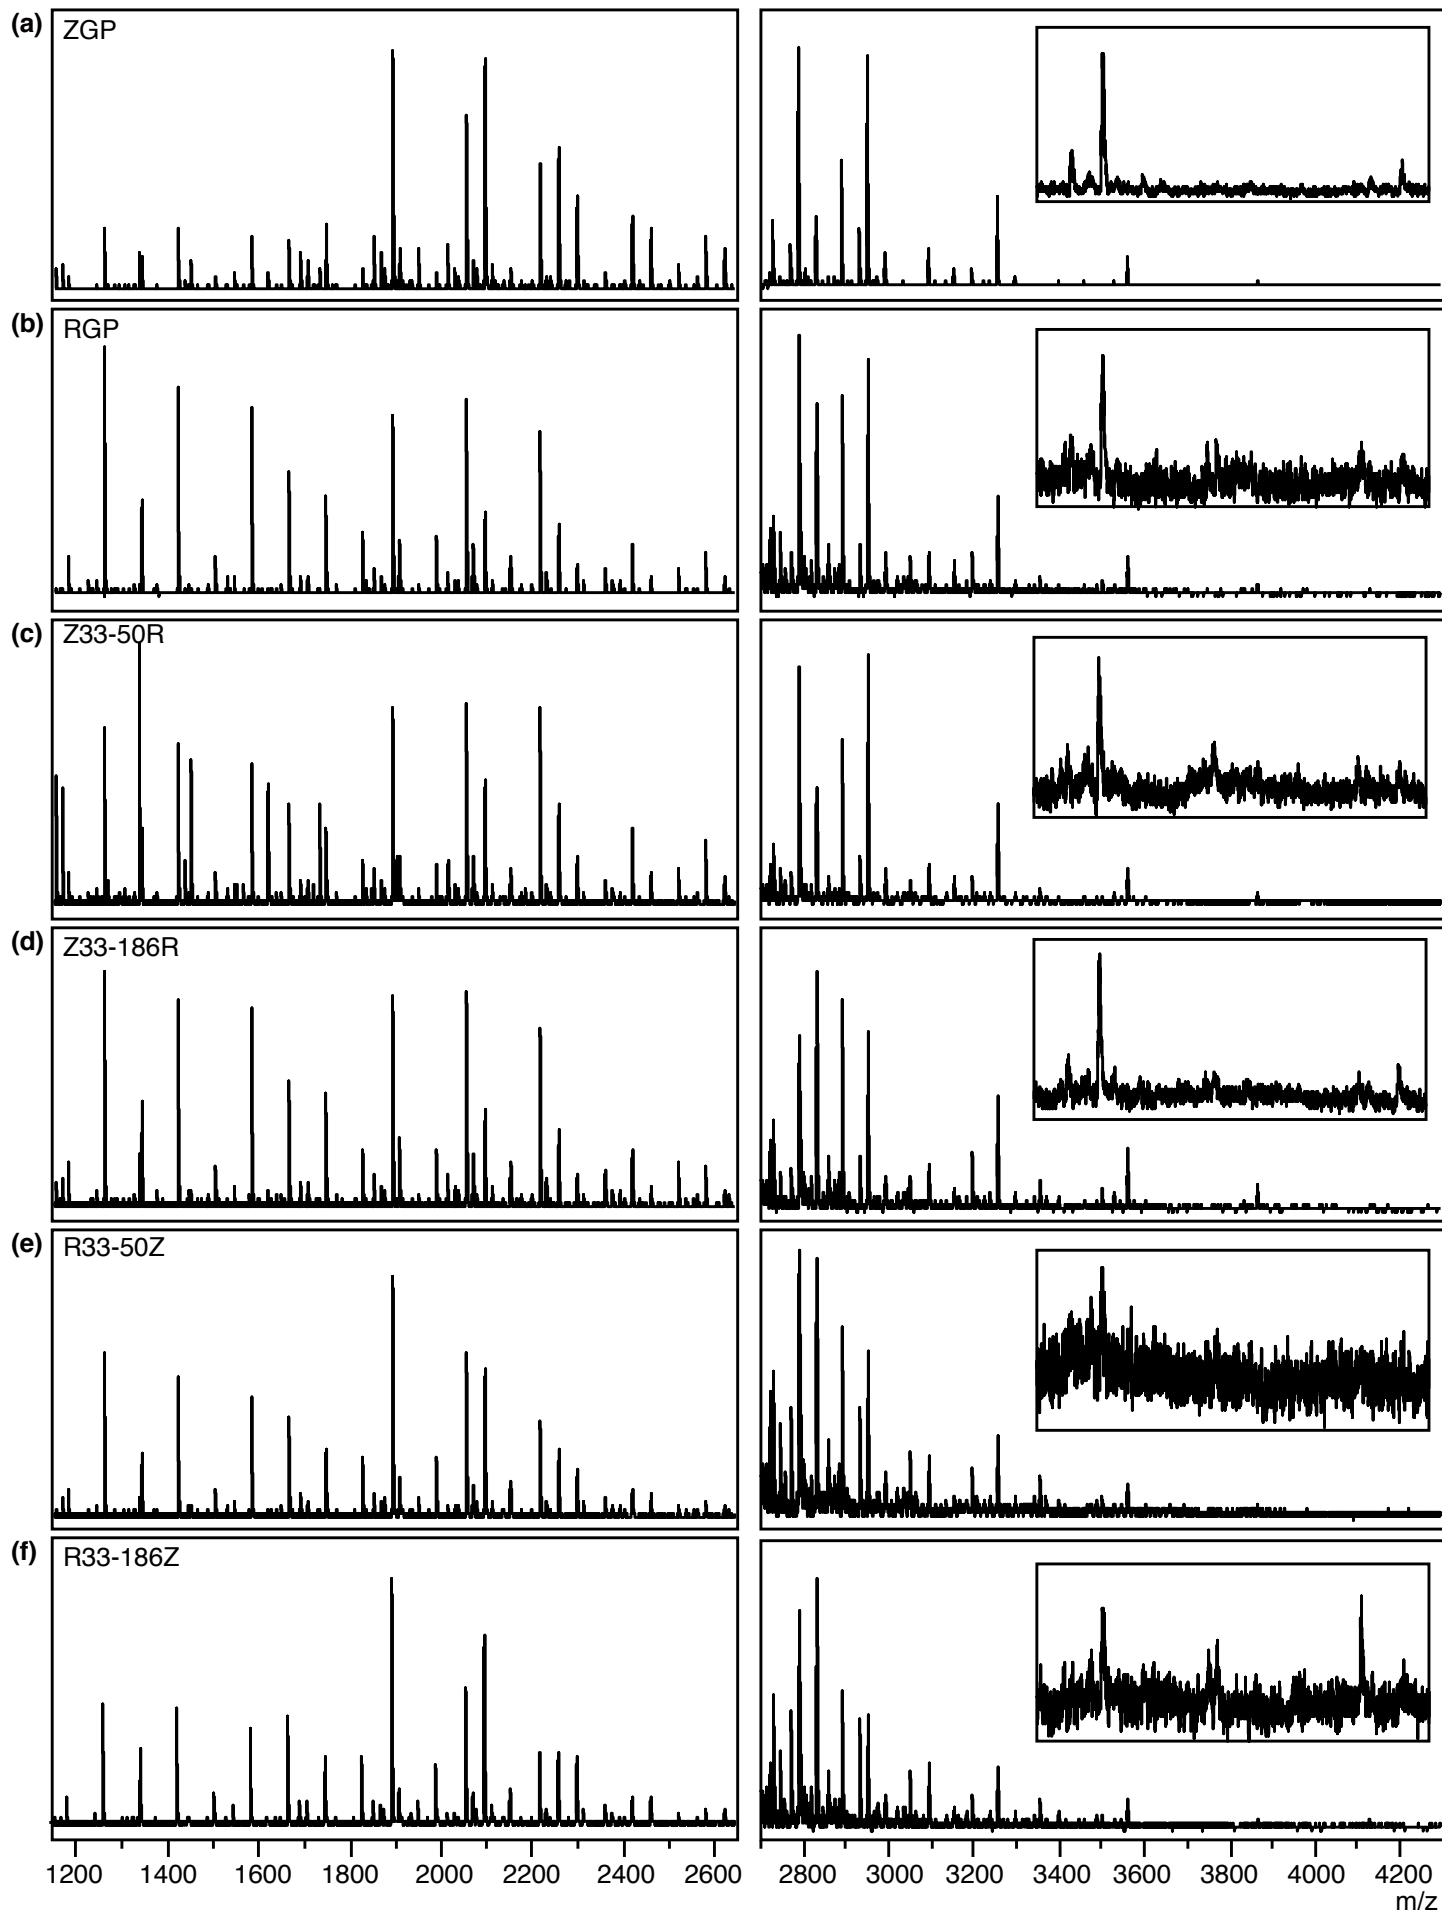



Figure S3

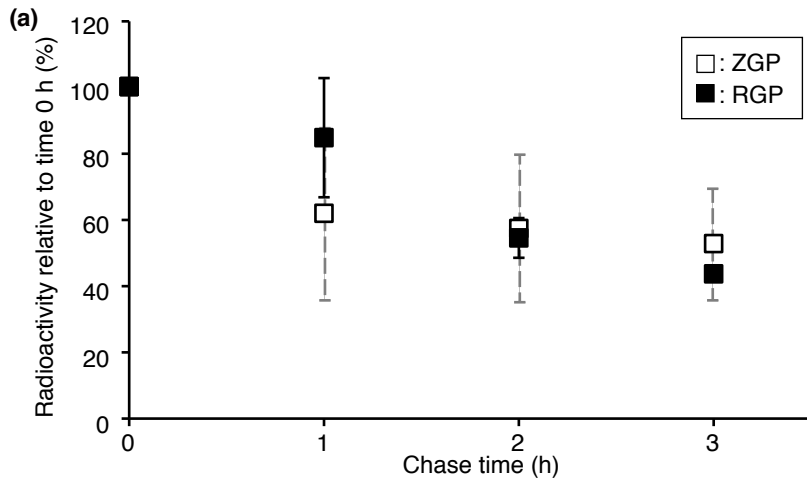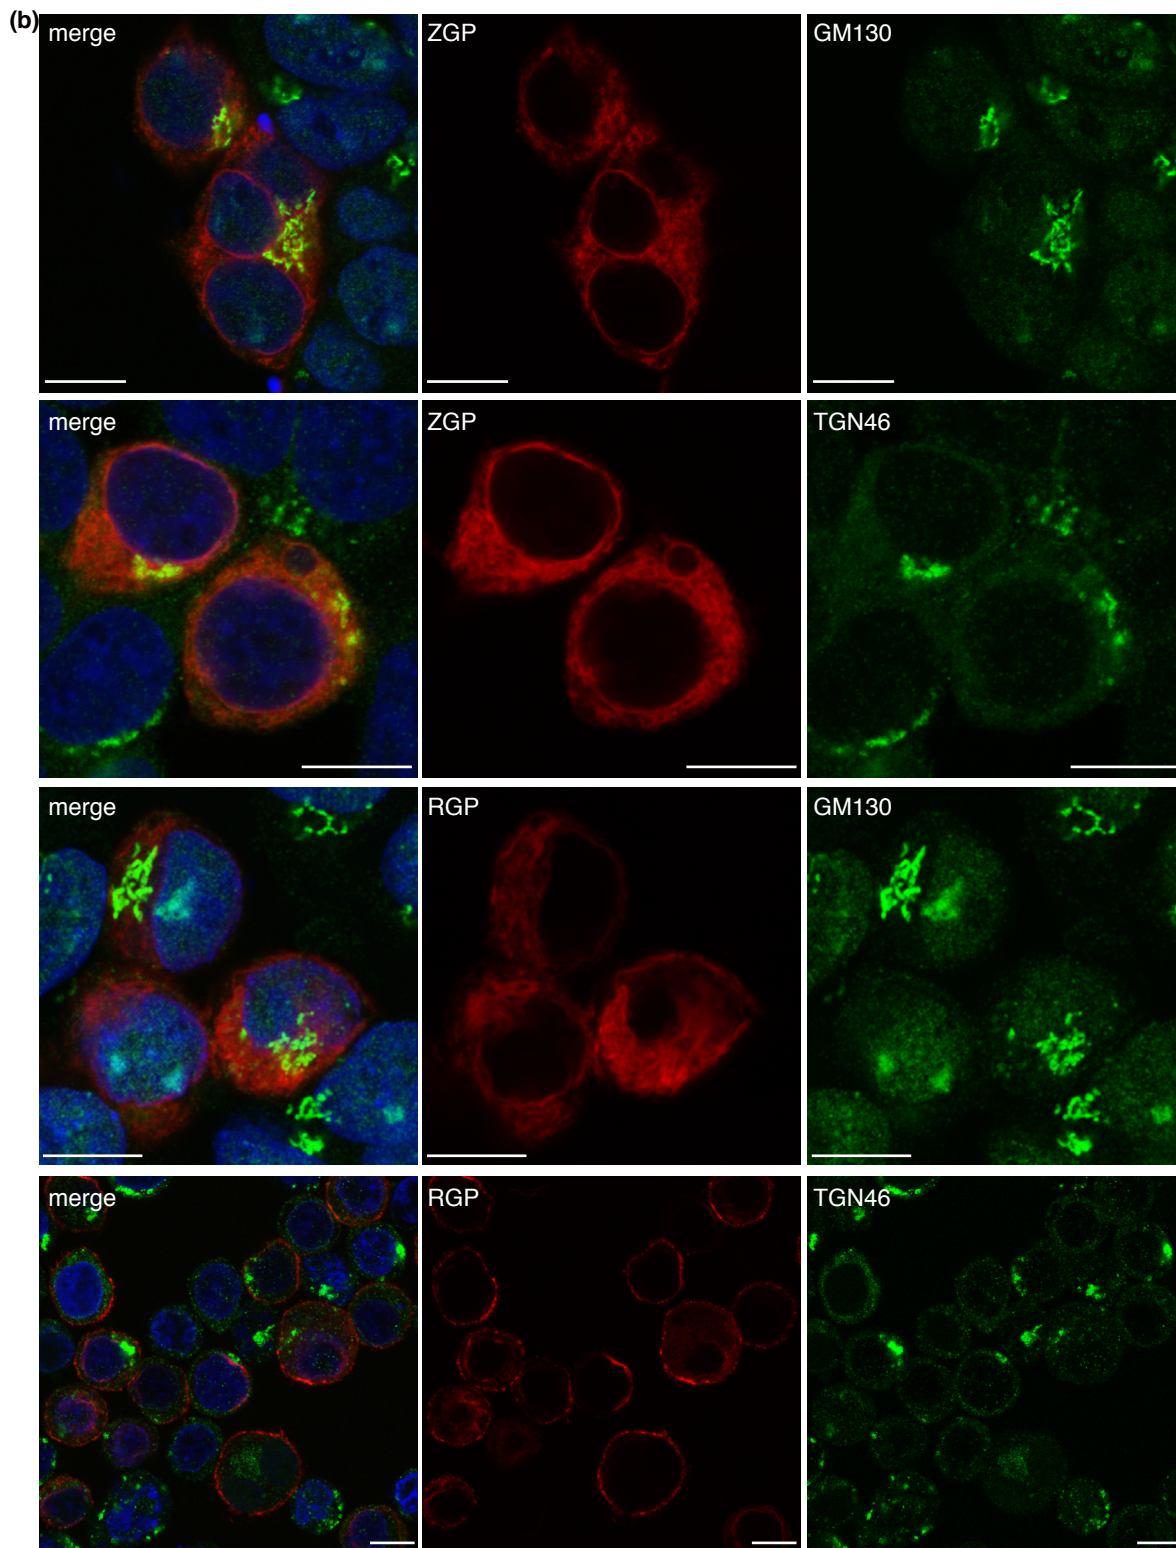

Figure S4

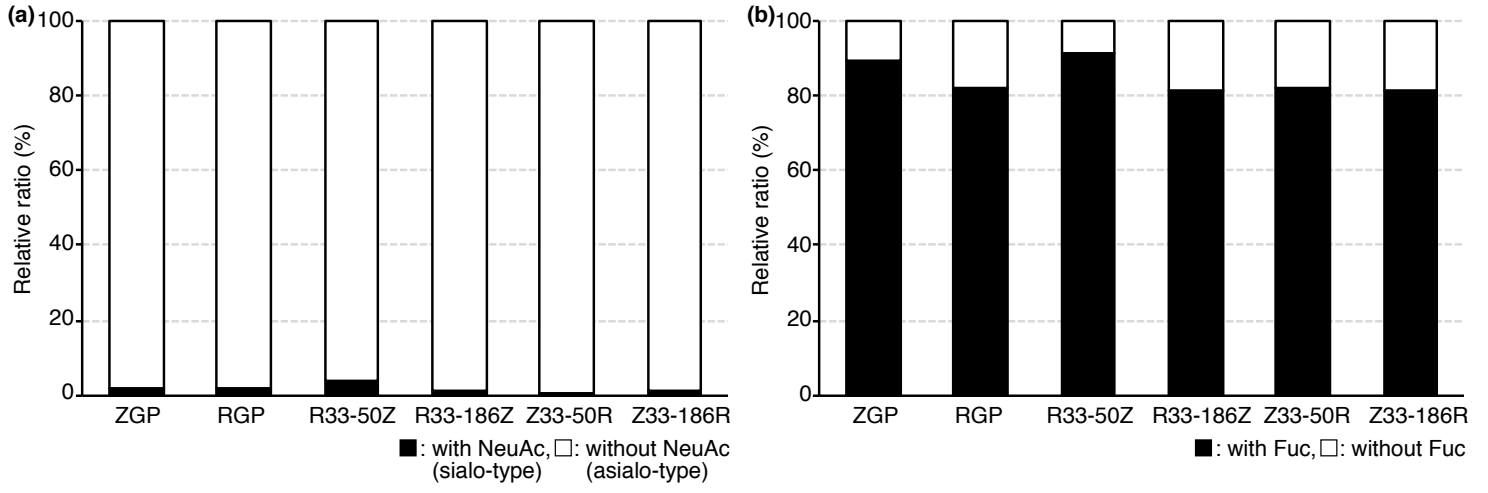

Figure S5

**Figure 1c**

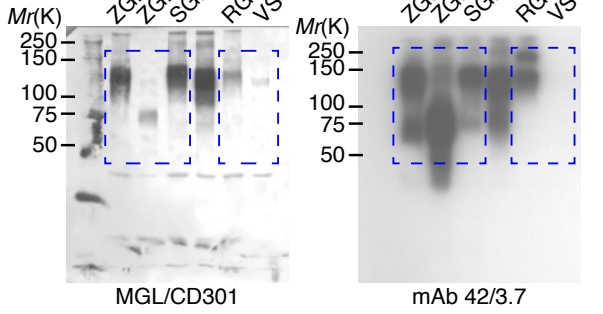

**Figure 1d**

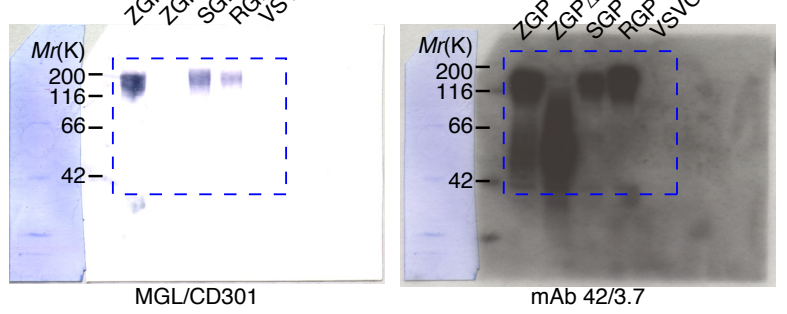

**Figure 2b**

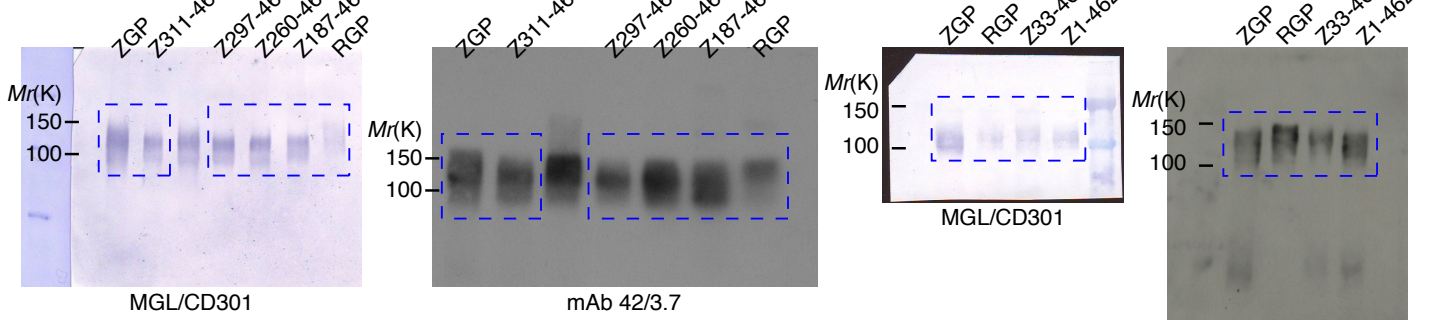

**Figure 3b**

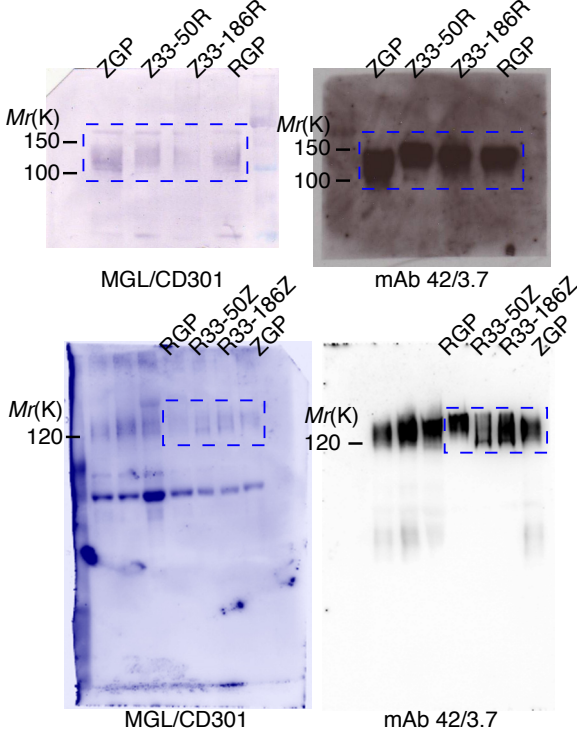

**Figure 3d**

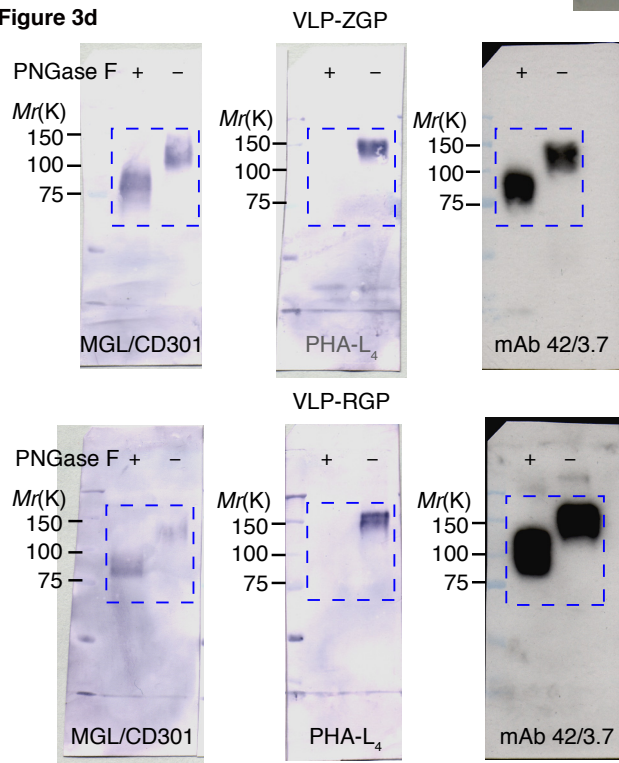

**Figure 5a**

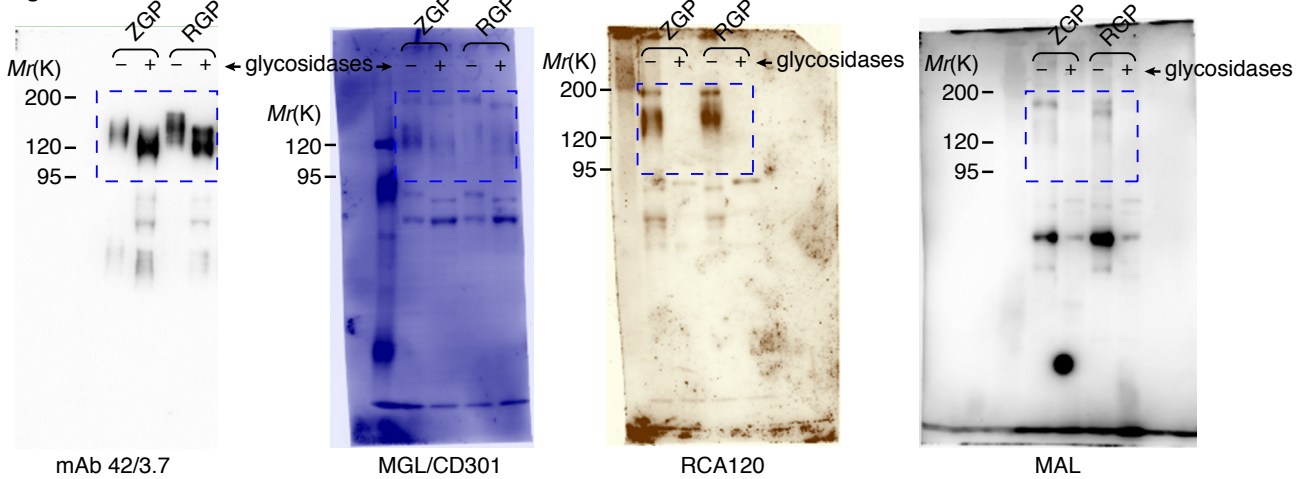

Figure S6

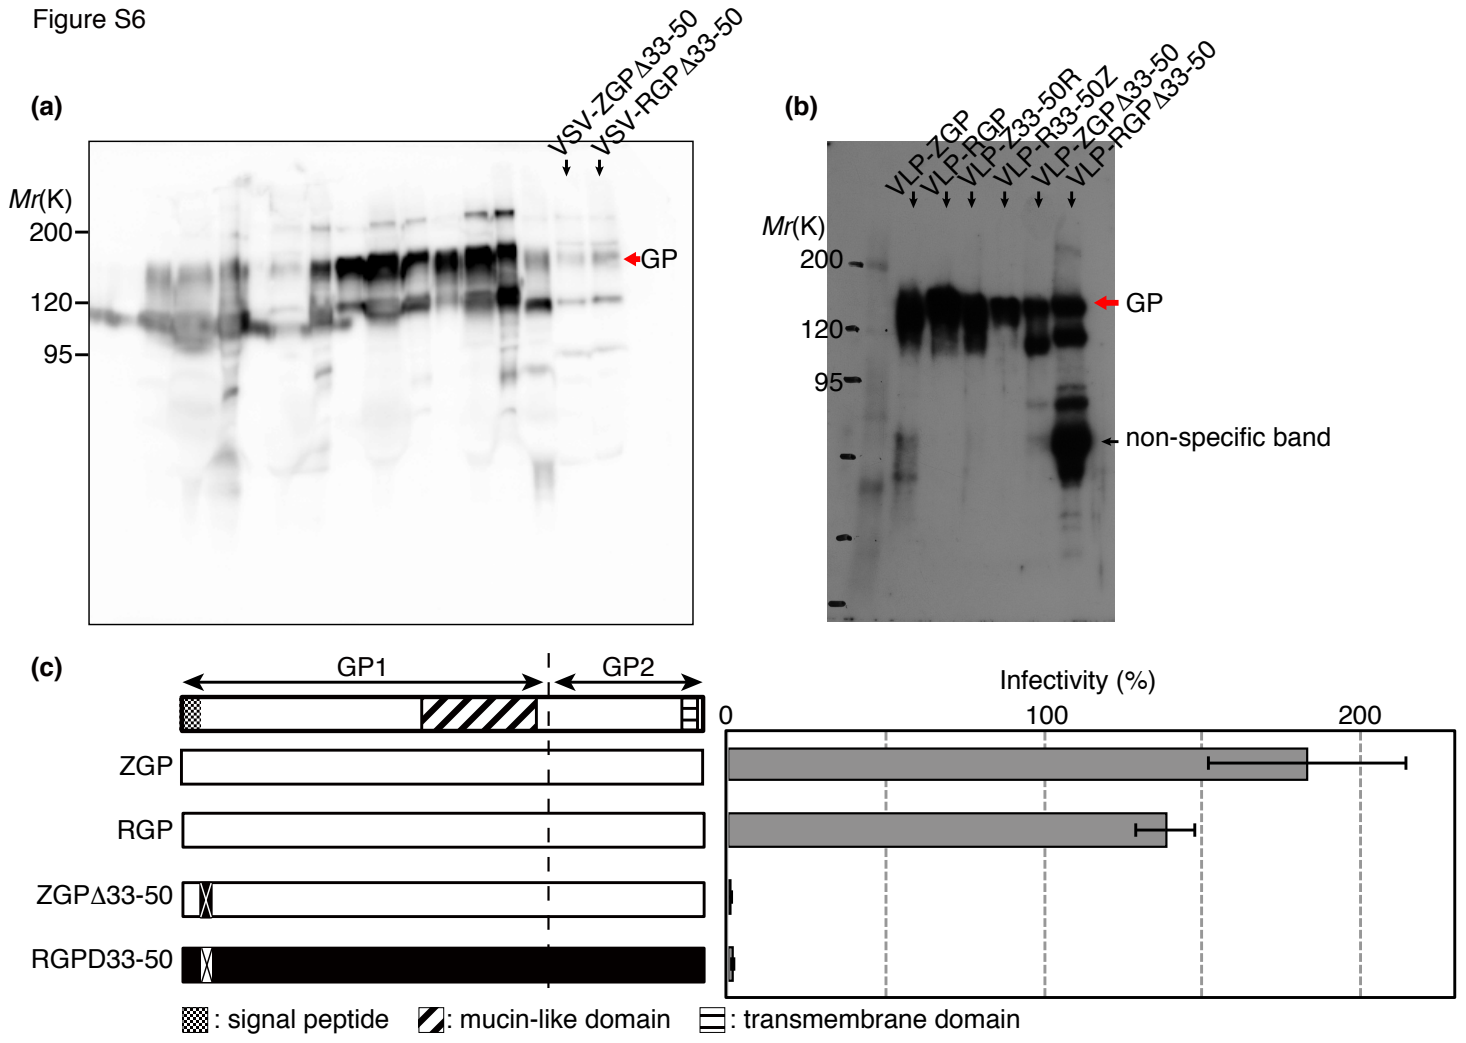

Supplement: 41598_2018_23357_MOESM1_ESM.pdf [file 41598_2018_23357_MOESM1_ESM.pdf]
